# Supplementary material for: Younger vampire bats (Desmodus rotundus) are more likely than adults to explore novel objects
Source: PLoS One. 2018 May 3;13(5):e0196889. doi: 10.1371/journal.pone.0196889 (PMC5933745; doi:10.1371/journal.pone.0196889)
Supplement: S1 Script — (R) [file pone.0196889.s001.R]

# Analysis for "Younger vampire bats (Desmodus rotundus) are more likely than adults to explore novel objects" PLOS One
# Gerald G. Carter, Sofia Forss, Rachel A. Page, John M. Ratcliffe
# by Gerry Carter, April 15, 2018

# load packages
library(boot)
library(tidyverse)

# functions
mean.w <- function(x,w) sum(x*w)

# choose number of permutations
perms <- 5000 

# EXPERIMENT 1-----

# list trials
trial <- as.character(rep(1:25,each=2))

# list treatment condition
trt <- c("trapped bat", "trapped bat","novel object","novel object","trapped bat","trapped bat","novel object","novel object","trapped bat","trapped bat","novel object","novel object","trapped bat","trapped bat","novel object","novel object","trapped bat","trapped bat","novel object","novel object","trapped bat","trapped bat","novel object","novel object","trapped bat","trapped bat","novel object","novel object","trapped bat","trapped bat","novel object","novel object", rep("trapped bat", 18))

# list category of bats
category <- rep(c("others","young_males"), 25)

# list number of bats of that category in the cage
number.bats <- rep(c(34,8),25)

# list number of observed visits
visits <- c(1,8,0,8,1,8,0,6,2,8,0,8,4,8,0,8,1,8,0,7,1,8,0,8,0,6,0,6,0,8,0,8,0,5,3,8,3,8,1,2,0,4,1,5,0,5,0,3,0,4)

# compile variables
data1 <-  data.frame(trial,trt,category,number.bats,visits)

# check
data1

# analyze totals from all trials (assuming independence of visits)
counts <- 
  data1 %>% 
  group_by(category, trt) %>% 
  summarize(total.visits=sum(visits))
table <- xtabs(total.visits ~ category+trt, data=counts)
table
fisher.test(table)

# analyze proportions using permutation test (assuming independence of trials)

# test interaction effect
# does treatment (trapped bat or novel object) effect response of young males differently than the others?
trials <- 
  data1 %>% 
  mutate(not.visit=number.bats-visits)
y <-  cbind(trials$visits, trials$not.visit)  

# get observed effect
obs <-  glm(y ~ trt*category,data = trials,family = binomial(link="logit"))$coefficients[4]

# permutation test
exp <- rep(NA,perms) # create vector to fill with expected effects
rand.data <- data1 # create new random version of data
# permute data
set.seed(1)
for (i in 1:perms){ # loop repeatedly 'perms' times the following:
  rand.data$trt <- sample(rand.data$trt)
  rtrials <- 
    rand.data %>% 
    mutate(not.visit=number.bats-visits)
  ry <-  cbind(rtrials$visits, rtrials$not.visit)  
  exp[i] <-glm(ry ~ trt*category,data = rtrials,family = binomial(link="logit"))$coefficients[4] # save expected values
}

# plot expected and observed (red line)
hist(exp, breaks=50, xlim=c(-abs(obs), abs(obs)))
abline(v=obs, col="red")

#pvalue for interaction affect
p <- sum(abs(exp)>abs(obs))/length(!is.na(exp))
p
# p=0.0018

# now analyze each category of bat separately
# did a greater proportion of males visit novel objects vs trapped bats?-----
# code is similar to above
males <- 
  data1 %>% 
  filter(category=="young_males") %>% 
  mutate(not.visit=number.bats-visits)
y <-  cbind(males$visits, males$not.visit)  

# get observed effect
obs <-  glm(y ~ trt,data = males,family = binomial(link="logit"))$coefficients[2]

# permutation test
# choose number of permutations
exp <- rep(NA,perms) # create vector to fill with expected effects
# permute data
set.seed(1)
for (i in 1:perms){ # loop repeatedly 'perms' times the following:
  rand <- 
    data1 %>% 
    filter(category=="young_males") %>%
    mutate(trt=sample(trt)) %>% # permute data
    mutate(not.visit=number.bats-visits)
  y <-  cbind(rand$visits, rand$not.visit)  
  exp[i] <-glm(y ~ trt,data = rand,family = binomial(link="logit"))$coefficients[2] # save expected values
}

# plot expected and observed (red line)
hist(exp, breaks=100)
abline(v=obs, col="red")

#pvalue
p <- sum(abs(exp)>abs(obs))/length(!is.na(exp))
p
# p= 0.0978

# did a greater proportion of others (not young males) visit novel objects vs trapped bats?-----
notmales <- 
  data1 %>% 
  filter(category!="young_males") %>% 
  mutate(not.visit=number.bats-visits)
y <-  cbind(notmales$visits, notmales$not.visit)  

# get observed effect
obs <-  glm(y ~ trt,data = notmales,family = binomial(link="logit"))$coefficients[2]

# permutation test
exp <- rep(NA,perms) # create vector to fill with expected effects
set.seed(1)
for (i in 1:perms){ # loop repeatedly 'perms' times the following:
  rand <- 
    data1 %>% 
    filter(category!="young_males") %>%
    mutate(trt=sample(trt)) %>% # permute data
    mutate(not.visit=number.bats-visits)
  y <-  cbind(rand$visits, rand$not.visit)  
  exp[i] <-glm(y ~ trt,data = rand,family = binomial(link="logit"))$coefficients[2] # save expected values
}

# plot expected and observed (red line)
hist(exp, breaks=100)
abline(v=obs, col="red")

#pvalue 
p <- sum(abs(exp)>abs(obs))/length(!is.na(exp))
p
# p= 0.0042

# get means and confidence intervals of proportions-----

# get proportions 
data1$prop.visits <- data1$visits/data1$number.bats

# define subsets to get mean and 95% CI
trapped <- subset(data1, category=="others" & trt=="trapped bat")
object <- subset(data1, category=="others" & trt=="novel object")
mtrapped <- subset(data1, category=="young_males" & trt=="trapped bat")
mobject <- subset(data1, category=="young_males" & trt=="novel object")

# boot strap the 95% CI
sum(trapped$visits) # 18
mean(trapped$prop.visits) #0.0311
tboot <- boot(data=trapped$prop.visits, statistic=mean.w, R=5000, stype="w")
boot.ci(tboot, type="bca")
# others to trapped bat 0.0156--0.0502

oboot <- boot(data=object$prop.visits, statistic=mean.w, R=5000, stype="w")
sum(object$visits) # 0
mean(object$prop.visits) # 0
boot.ci(oboot, type="bca")
# error because no observations; others to novel object all 0

tboot2 <- boot(data=mtrapped$prop.visits, statistic=mean.w, R=5000, stype="w")
sum(mtrapped$visits) #106
mean(mtrapped$prop.visits) #0.7794
boot.ci(tboot2, type="bca")
# young_males to trapped bat 0.6324--0.8824

oboot2 <- boot(data=mobject$prop.visits, statistic=mean.w, R=5000, stype="w")
sum(mobject$visits) #59
mean(mobject$prop.visits) #0.9219
boot.ci(oboot2, type="bca")
# young_males to novel object 0.8125--0.9688


# EXPERIMENT 2----

# compare visitation rate in 2016 vs 2017
trials <- c(1,	2,	3,	4,	5,	6,	7,	8,	9,	10,	11,	12,	13,	13,	13,	13,	13,	13,	14,	14,	14,	14,	14,	14,	14,	15,	16,	16,	16,	16,	16,	16,	16,	16,	17,	18,	18,	18,	18,	18,	18,	18,	18,	18,	18,	18,	18,	18,	18,	18,	18,	18,	19,	19,	19,	19,	19,	19,	19,	19,	19,	20,	20,	20,	20,	20,	20)

visit <- c(0,	1,	0,	0,	0,	0,	0,	0,	0,	0,	0,	0,	1,	1,	1,	1,	1,	1,	1,	1,	1,	1,	1,	1,	1,	1,	1,	1,	1,	1,	1,	1,	1,	1,	0,	1,	1,	1,	1,	1,	1,	1,	1,	1,	1,	1,	1,	1,	1,	1,	1,	1,	1,	1,	1,	1,	1,	1,	1,	1,	1,	1,	1,	1,	1,	1,	1)
df <- data.frame(trials,visit)
df$year <-  ifelse(df$trials<13,"2016","2017")
df$trials <- as.factor(df$trials)
years <- 
  df %>%
  group_by(as.factor(trials)) %>% 
  summarize(visits=sum(visit), year= first(year))

# poisson GLM for counts
obs <- glm(visits~year, data=years, family= "poisson")$coefficients[2]

exp <- rep(NA,perms) # create vector to fill with expected effects
set.seed(1)
for (i in 1:perms){ # loop repeatedly 'perms' times the following:
  rand <- 
    df %>%
    group_by(as.factor(trials)) %>% 
    summarize(visits=sum(visit), year= first(year)) %>% 
    mutate(year= sample(year))
  exp[i] <- glm(visits~year, data=rand, family= "poisson")$coefficients[2]
}

# plot expected and observed (red line)
hist(exp, breaks=100)
abline(v=obs, col="red")

#pvalue 
sum(abs(exp)>abs(obs))/length(!is.na(exp))
# p=0.0046

# trials 1-12 at sunset yielded no observations of known bats
# exclude observations of unknown bats
# get data for trials 13- 17
trials <- c(13,	13,	13,	14,	14,	14,	16,	16,	16,	20,	20,	20,	18,	18,	18,	19,	19,	19,	15,	15,	15,	17,	17,	17)
category <- c("adult_females",	"young_females",	"young_males",	"adult_females",	"young_females",	"young_males",	"adult_females",	"young_females",	"young_males",	"adult_females",	"young_females",	"young_males",	"adult_females",	"young_females",	"young_males",	"adult_females",	"young_females",	"young_males",	"adult_females",	"young_females",	"young_males",	"adult_females",	"young_females",	"young_males")
number.bats <- rep(c(24,6,6),8)
age <- rep(c("a","y","y"),8)
sex <- rep(c("f","f","m"),8)
visits <- c(0,	2,	0,	2,	2,	1,	0,	3,	1,	1,	1,	2,	1,	0,	5,	0,	0,	2,	0,	0,	0,	0,	0,	0)
data2 <-  data.frame(trials, category,number.bats,age,sex, visits)
data2$prop <- data2$visits/data2$number.bats

# analyze totals from all trials (assuming independence of visits)
counts2 <- 
  data2 %>% 
  mutate(not.visits= number.bats-visits) %>% 
  group_by(age) %>% 
  summarize(total.visits=sum(visits), total.not= sum(not.visits)) %>% 
  select(-age) %>% 
  as.matrix()
rownames(counts2) <- c("adult", "young")

counts2

fisher.test(counts2)

# permutation test
d2 <- 
  data2 %>% 
  mutate(not.visits= number.bats-visits) %>% 
  group_by(trials,age) %>% 
  summarize(total.visits=sum(visits), total.not= sum(not.visits)) 
y <- cbind(d2$total.visits, d2$total.not)

obs <-  glm(y ~ age,data = d2,family = binomial(link="logit"))$coefficients[2]

# permutation test
exp <- rep(NA,perms) # create vector to fill with expected effects
set.seed(1)
for (i in 1:perms){ # loop repeatedly 'perms' times the following:
  rand <- 
    data2 %>% 
    mutate(age=sample(age)) %>% 
    mutate(not.visits= number.bats-visits) %>% 
    group_by(trials,age) %>% 
    summarize(total.visits=sum(visits), total.not= sum(not.visits)) 
  ry <- cbind(rand$total.visits, rand$total.not)  
  exp[i] <-glm(ry ~ age,data = rand,family = binomial(link="logit"))$coefficients[2] # save expected values
}

# plot expected and observed (red line)
hist(exp, breaks=100)
abline(v=obs, col="red")

#pvalue 
sum(abs(exp)>abs(obs))/length(!is.na(exp))
# p=0.0052

# subset data
af <- subset(data2, category=="adult_females")
y <-  subset(data2, age=="y")
yf <- subset(data2, category=="young_females")
ym <- subset(data2, category=="young_males")

afboot=boot(data=af$prop, statistic=mean.w, R=5000, stype="w")
boot.ci(afboot, type="bca")
mean(af$prop)

yboot=boot(data=y$prop, statistic=mean.w, R=5000, stype="w")
boot.ci(yboot, type="bca")
mean(y$prop)

yfboot=boot(data=yf$prop, statistic=mean.w, R=5000, stype="w")
boot.ci(yfboot, type="bca")
mean(yf$prop)

ymboot=boot(data=ym$prop, statistic=mean.w, R=5000, stype="w")
boot.ci(ymboot, type="bca")
mean(ym$prop)

# plots-----
data1$prop <- data1$visits/data1$number.bats
head(data1)
data1$trt <- factor(data1$trt, c("trapped bat" , "novel object"))
data1$category <- factor(data1$category, c("young_males", "others"))
levels(data1$category)

plot1a <- ggplot(data=data1, mapping= aes(x=trt, y=prop, fill=category))+ 
  geom_dotplot(binaxis="y", binwidth = 0.02, stackdir="center")+
  xlab("stimulus type")+
  ylab("proportion of bats in each category that visited the stimulus")+
  theme_classic()
plot1a

plot2 <- 
  ggplot(data=data2, mapping= aes(x=category, y=prop, fill=category))+ 
  geom_dotplot(binaxis="y", binwidth = 0.02, stackdir="center")+
  xlab("category of bat")+
  ylab("proportion of bats in each category that explored the stimulus")+
  theme_classic()
plot2

# end
